# Supplementary material for: A novel strategy of entropy engineering at the A-site in spinel oxides for developing high-performance SOFC cathodes
Source: Royal Society of Chemistry journal article supplement (doi:10.1039/d4ta04925j), 2024-01-01
Supplement: d4ta04925j1.pdf [file d4ta04925j1.pdf]

## Supporting information

### **A Novel Strategy of Entropy Engineering at the A-Site in Spinel Oxides for Developing High-Performance SOFC Cathodes**

Zhaohui Chen <sup>a</sup>, Ben Ma <sup>b, c\*</sup>, Chen Dang <sup>a</sup>, Jian Che <sup>b</sup>, Lin Cheng <sup>b</sup>, Yingke Zhou <sup>c\*\*</sup>

<sup>a</sup> Collaborative Innovation Center for Advanced Steels, Wuhan University of Science  
and Technology, Wuhan 430081, China

<sup>b</sup> College of Science, Wuhan University of Science and Technology, Wuhan 430081,  
China

<sup>c</sup> The State Key Laboratory of Refractories and Metallurgy, Institute of Advanced  
Materials and Nanotechnology, Wuhan University of Science and Technology,  
Wuhan 430081, China

---

\* Corresponding author. Tel.: +86 2768 862772, Fax: +86 2768 862772. E-mail: [maben@wust.edu.cn](mailto:maben@wust.edu.cn) (B. Ma).

\*\* Corresponding author. Tel.: +86 2768 862928, Fax: +86 2768 862928. E-mail: [zhouyk@wust.edu.cn](mailto:zhouyk@wust.edu.cn) (Y. Zhou).

## Supplemented figures

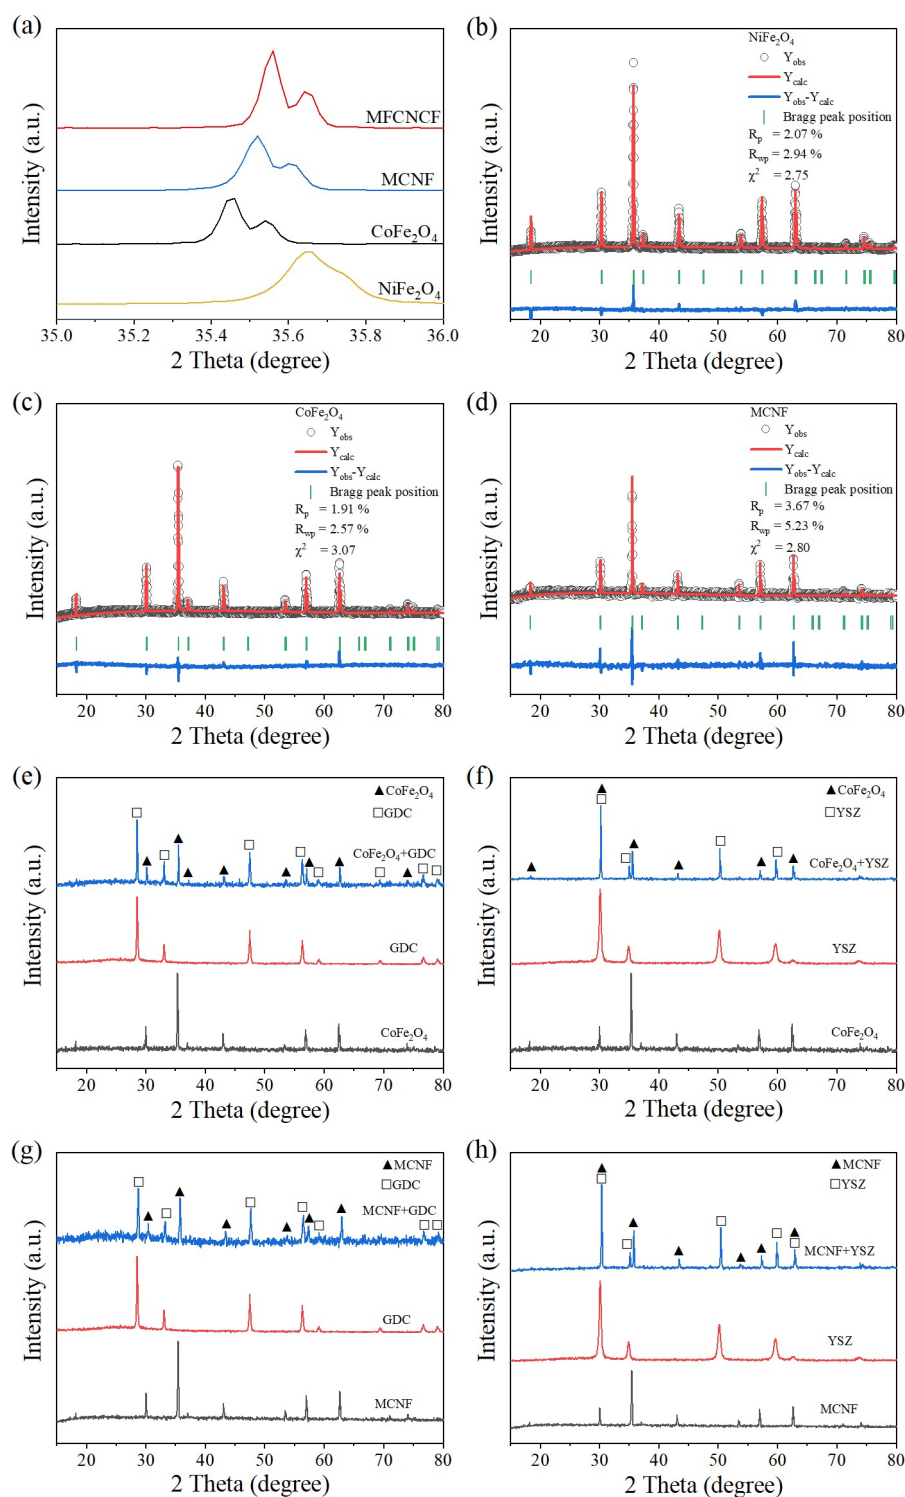

**Fig. S1** (a) A magnification of the same XRD from 35.28° to 36.28° of 2θ; The Rietveld refinement patterns of pristine NiFe<sub>2</sub>O<sub>4</sub> (b), CoFe<sub>2</sub>O<sub>4</sub> (c) and MCNF (d); Chemical compatibility of CoFe<sub>2</sub>O<sub>4</sub> (e-f) and MCNF (g-h).

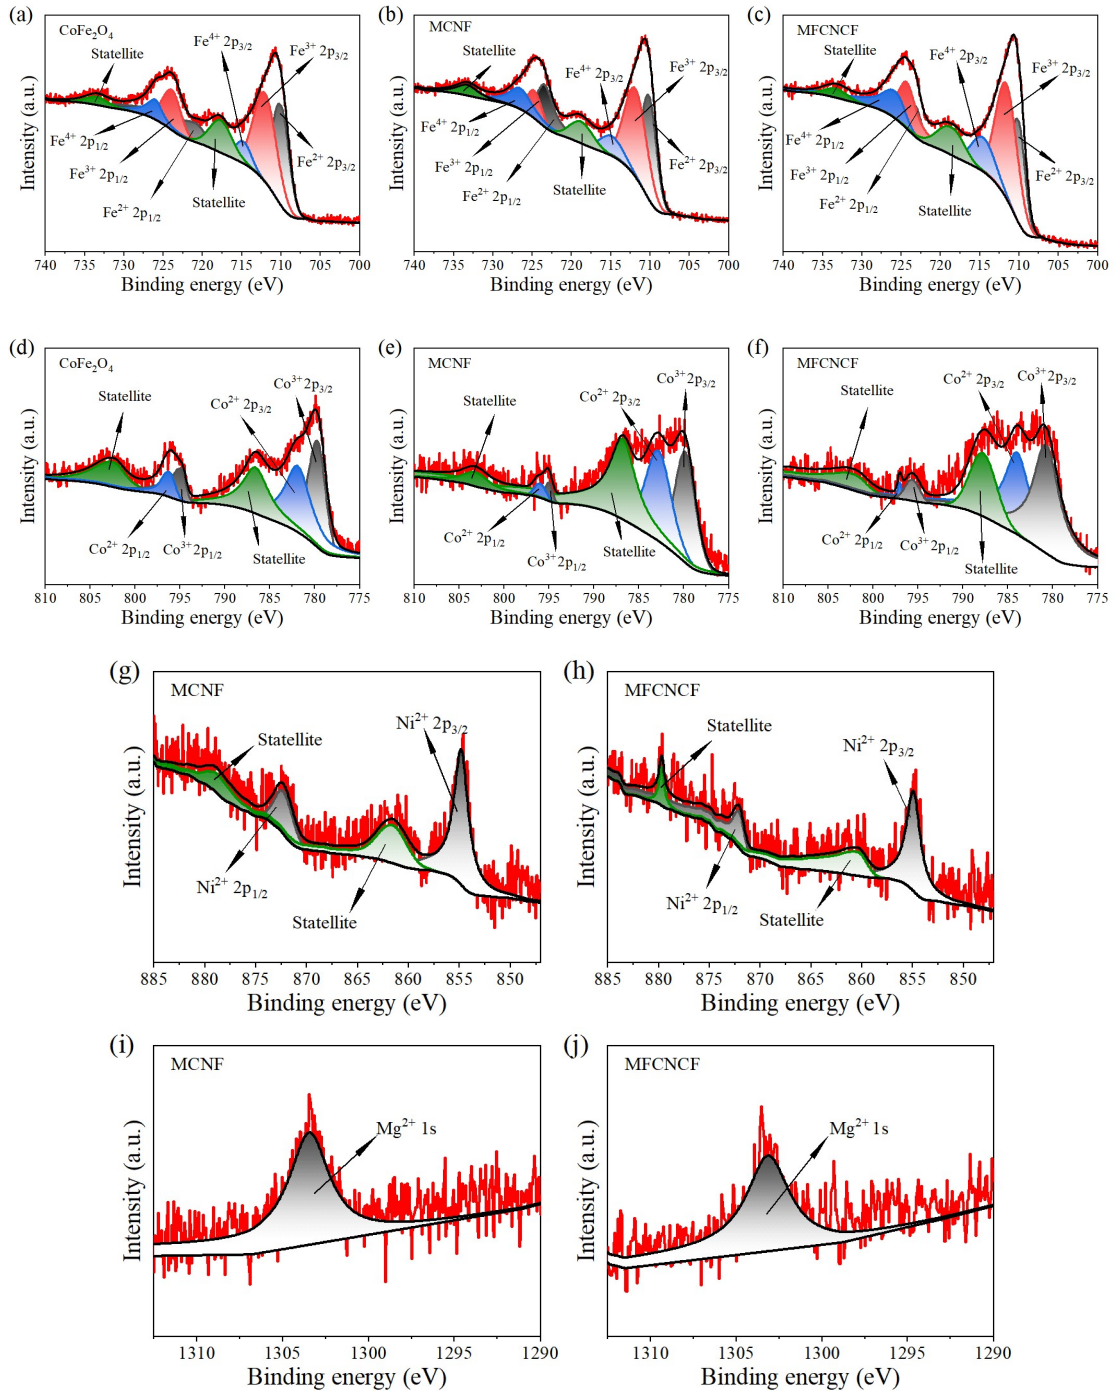

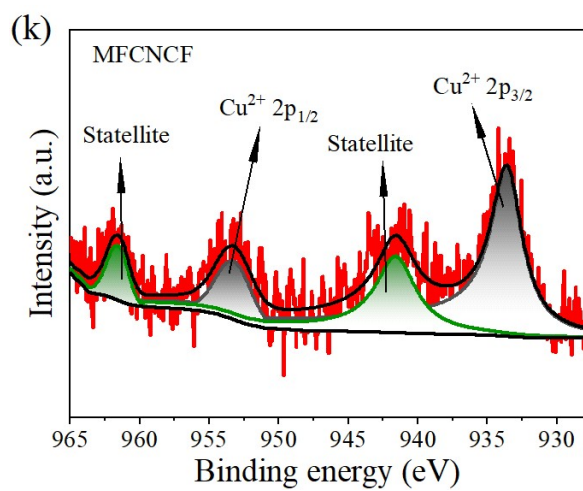

**Fig. S2** XPS spectra of  $\text{CoFe}_2\text{O}_4$ , MCNF and MFCNCF: high resolution spectra of

Fe 2p (a-c); Co 2p (d-f); Ni 2p (g-h); Mg 1s (i-j) and Cu 2p (k).

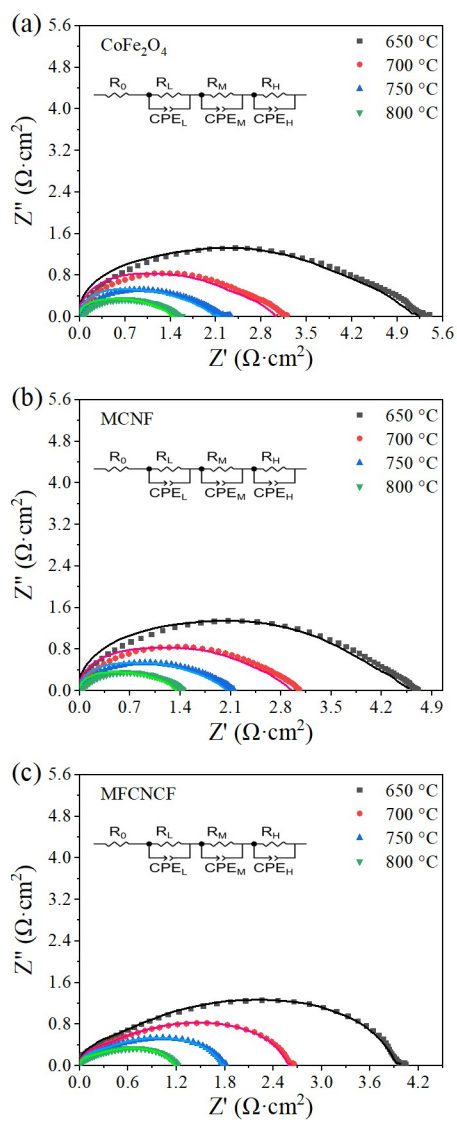

**Fig. S3** Nyquist plots of  $\text{CoFe}_2\text{O}_4$  (a), MCNF (b) and MFCNCF (c) from 650 to 800 °C.

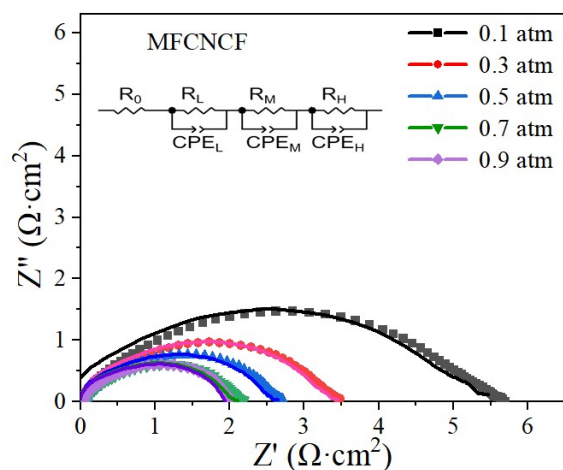

**Fig. S4** EIS plot of MFCNCF symmetric cell under different oxygen partial pressures at 750°C.

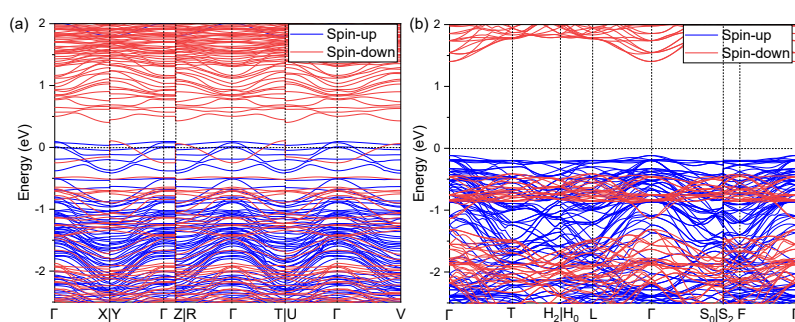

**Fig. S5** The electronic band structures of MFCNCF (a) and  $\text{CoFe}_2\text{O}_4$  (b)

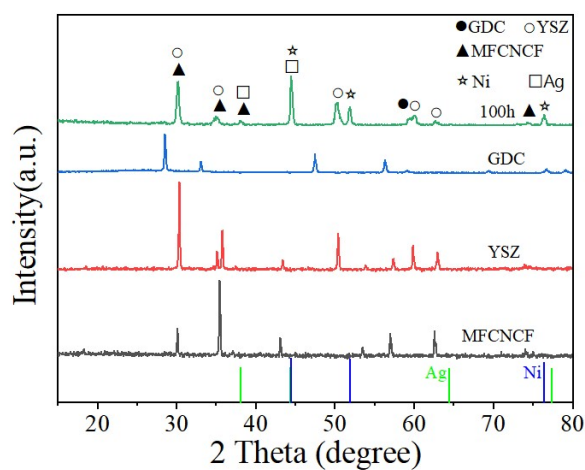

**Fig. S6** XRD of cell cross-section of the single cell after 100 h long-term testing.

**Table S1** Molar ratio between metal cations for CoFe<sub>2</sub>O<sub>4</sub>, MCNF, and MFCNCF

| Ratio                                                 | CoFe <sub>2</sub> O <sub>4</sub> | MCNF  | MFCNCF |
|-------------------------------------------------------|----------------------------------|-------|--------|
| Fe <sup>2+</sup> + Fe <sup>3+</sup> /Fe <sup>4+</sup> | 7.284                            | 4.593 | 2.999  |
| Co <sup>2+</sup> /Co <sup>3+</sup>                    | 0.919                            | 0.870 | 0.776  |

**Table S2** Comparison of the K<sub>ex</sub> and D<sub>chem</sub> of different spinel-based cathode in this study and reported in literature at 800 °C

| Material                                                             | K <sub>ex</sub> (cm·s <sup>-1</sup> ) | D <sub>chem</sub> (cm <sup>2</sup> ·s <sup>-1</sup> ) | reference |
|----------------------------------------------------------------------|---------------------------------------|-------------------------------------------------------|-----------|
| CoFe <sub>2</sub> O <sub>4</sub>                                     | 1.01 × 10 <sup>-4</sup>               | 1.05 × 10 <sup>-5</sup>                               | This work |
| MCNF                                                                 | 1.36 × 10 <sup>-4</sup>               | 3.10 × 10 <sup>-5</sup>                               | This work |
| MFCNCF                                                               | 1.95 × 10 <sup>-4</sup>               | 8.82 × 10 <sup>-5</sup>                               | This work |
| CuBi <sub>2</sub> O <sub>4</sub>                                     | 5.93 × 10 <sup>-3</sup>               | 6.71 × 10 <sup>-6</sup>                               | 1         |
| Ni <sub>0.2</sub> Fe <sub>0.8</sub> Co <sub>2</sub> O <sub>4</sub>   | 4.8 × 10 <sup>-5</sup>                | 1.7 × 10 <sup>-6</sup>                                | 2         |
| Mg <sub>0.4</sub> Ni <sub>1.4</sub> Mn <sub>1.2</sub> O <sub>4</sub> | 1.2 × 10 <sup>-3</sup>                | 6 × 10 <sup>-5</sup>                                  | 3         |

**Table S3** Relationship between Reaction Order n Values from Theoretical Calculation and Experimental Testing for MFCNCF Cathode

| Steps | Elemental reactions                                                             | Reaction order | Polarization                   | Experimental result      |
|-------|---------------------------------------------------------------------------------|----------------|--------------------------------|--------------------------|
| 1     | O <sub>2</sub> (g) → 2O <sub>ad</sub>                                           | n = 1          | R <sub>L</sub>                 | n = 0.93                 |
| 2     | O <sub>ad</sub> ↔ O <sub>TPB</sub>                                              | n = 0.5        | R <sub>M</sub>                 | n = 0.45 (Rate-limiting) |
| 3     | O <sub>TPB</sub> + e <sup>-</sup> → O <sub>TPB</sub> <sup>-</sup>               | n = 0.375      | R <sub>M</sub> /R <sub>H</sub> | /                        |
| 4     | O <sub>TPB</sub> <sup>-</sup> + e <sup>-</sup> → O <sub>TPB</sub> <sup>2-</sup> | n = 0.125      | R <sub>H</sub>                 | n = 0.27                 |
| 5     | O <sub>TPB</sub> <sup>2-</sup> + V <sub>Ö</sub> ↔ O <sub>o</sub> <sup>x</sup>   | n = 0          | R <sub>H</sub>                 | /                        |





Reference:

1 N. Li, L. Sun, Q. Li, T. Xia, L. Huo and H. Zhao, *J. Power Sources*, 2021, **511**, 230447.

2 F. Zhong, *Chem. Eng. J.*, 2021, **425**, 131822.

3 F. Zhong, X. Wang, C. Han, H. Fang, Y. Huang, Y. Luo, C. Chen, L. Lin, C. Au and L. Jiang, *J. Alloys Compd.*, 2023, **939**, 168625.
